# Supplementary material for: Orienting the causal relationship between imprecisely measured traits using GWAS summary data
Source: PubMed Central journal article supplement (PMC5711033; doi:10.1371/journal.pgen.1007081), 2017-11-17
Supplement: pgen.1007081.s003.pdf [file pgen.1007081.s003.pdf]

# Supplementary materials: Orienting the causal relationship between imprecisely measured traits using GWAS summary data

## **S3 Text. The influence of unmeasured confounding on the inference of causal directions**

We have assumed no unmeasured confounding in these simulations. Unmeasured confounding will however have potentially large influences on mediation-based methods for inferring causal directions, and can also adversely influence the estimate of the causal direction for the Steiger test.

### **Unmeasured confounding in mediation**

Including an unmeasured confounder,  $u$ , after ignoring intercept terms the exposure  $x$  and outcome  $y$  variables can be modelled as

$$\begin{aligned} y &= \beta_x x + \beta_{uy} u + \epsilon_x \\ x &= \beta_g g + \beta_{ux} u + \epsilon_g \end{aligned}$$

The observational estimate of the causal effect of  $x$  on  $y$ ,  $\hat{\beta}_x$  is obtained from

$$\begin{aligned} \hat{\beta}_x &= cov(x, y) / var(x) \\ &= \frac{\beta_g^2 \beta_x var(g) + \beta_{ux}^2 \beta_x var(u) + \beta_x var(\epsilon_g)}{\beta_g^2 var(g) + \beta_{ux}^2 var(u) + var(\epsilon_g)} \end{aligned}$$

From this it is clear that  $\beta_x$  and  $\hat{\beta}_x$  will differ when both  $\beta_{uy}$  and  $\beta_{ux}$  are non-zero. Relating to mediation, where we attempt to test if  $g$  associates with  $y$  after adjusting  $y$  for  $x$ , such that

$$\hat{y}^* = \hat{\beta}_x x$$

and

$$\begin{aligned} cov(g, y - \hat{y}^*) &= cov(g, \beta_x x + \beta_{uy} u + \epsilon_x - \hat{\beta}_x x) \\ &= cov(g, (\beta_x - \hat{\beta}_x)(\beta_g g + \beta_{ux} u + \epsilon_x)) \\ &= (\beta_x - \hat{\beta}_x) var(g) \end{aligned}$$

should any amount of unmeasured confounding exist, therefore, there will remain an association between  $g$  and  $y|x$ , which will introduce errors in inferring causal directions.

### **Unmeasured confounding in the MR Steiger test**

Similarly, we can investigate the extent to which unmeasured confounding will lead to the wrong causal direction between  $x$  and  $y$  using the MR Steiger test, evaluating the liability for the inequality  $cor(g, x)^2 > cor(g, y)^2$  being incorrect. After some algebra

$$\text{cor}(g, x)^2 = \frac{\beta_g^2}{\beta_g^2 \text{var}(g) + \beta_{ux}^2 \text{var}(u) + \text{var}(\epsilon_x)}$$

and

$$\text{cor}(g, y)^2 = \frac{\beta_x^2 \beta_g^2 \text{var}(g)^2}{\hat{\beta}_x^2 \beta_g^2 \text{var}(g) + \hat{\beta}_x^2 \beta_{ux}^2 \text{var}(u) + \beta_{uy}^2 \text{var}(u) + \text{var}(\epsilon_y)}$$

S2 fig shows the relationship between the magnitude of the correlations between  $x$ ,  $y$  and the confounder  $u$  for a range of  $\beta_{xy} = (-2, 2)$ ,  $\beta_{gx} = 0.1$  and a range of confounder effects. The pattern of results were similar for different values of  $\beta_{gx}$ . We note that in most cases for the parameter values explored, where the observational absolute  $\hat{R}_{xy}^2$  is less than 0.2, unmeasured confounding will not incur the wrong causal direction in the MR Steiger test.
