# Supplementary material for: Orienting the causal relationship between imprecisely measured traits using GWAS summary data
Source: PLOS journal article supplement (doi:10.1371/journal.pgen.1007081), 2017-11-17
Supplement: S1 (10.1371/journal.pgen.1007081.s001) [file journal.pgen.1007081.s001]

# Supplementary materials: Orienting the causal relationship between imprecisely measured traits using GWAS summary data

## S1 Text. The influence of measurement error in the exposure on mediation-based estimated

We assume the following model

$$\begin{aligned} x &= \alpha_g + \beta_g g + \epsilon_g \\ x_o &= \alpha_{mx} + \beta_{mx} x + \epsilon_{mx} \\ y &= \alpha_x + \beta_x x + \epsilon_x \\ y_o &= \alpha_{my} + \beta_{my} y + \epsilon_{my} \end{aligned}$$

where  $x$  is the exposure on the outcome  $y$ ,  $g$  is an instrument that has a direct effect on  $x$ ,  $x_o$  is the measured quantity of  $x$ , where measurement error is incurred from linear transformation in  $\alpha_{mx}$  and  $\beta_{mx}$  and imprecision from  $\epsilon_{mx}$ , and  $y_o$  is the measured quantity of  $y$ , where measurement error is incurred from linear transformation in  $\alpha_{my}$  and  $\beta_{my}$  and imprecision from  $\epsilon_{my}$ . Our objective is to estimate the expected magnitude of association between  $g$  and  $y$  after conditioning on  $x$ . Under the CIT, this is expected to be  $cov(g, y_o - \hat{y}_o) = 0$  when  $x$  causes  $y$ , where  $\hat{y}_o = \hat{\alpha}_{x_o} + \hat{\beta}_{x_o} x_o$  is the predicted value of  $y_o$  using the measured value of  $x_o$ .

We can split  $cov(g, y_o - \hat{y}_o)$  into two parts,  $cov(g, y_o)$  and  $cov(g, \hat{y}_o)$ .

### Part 1

$$\begin{aligned} cov(g, y_o) &= cov(g, \beta_{my} y) \\ &= cov(g, \beta_{my} \beta_x x) \\ &= cov(g, \beta_{my} \beta_x \beta_g g) \\ &= \beta_{my} \beta_x \beta_g var(g) \end{aligned}$$

### Part 2

$$\begin{aligned} cov(g, \hat{y}_o) &= cov(g, \hat{\beta}_{x_o} x_o) \\ &= cov(g, \hat{\beta}_{x_o} \beta_{mx} x) \\ &= cov(g, \hat{\beta}_{x_o} \beta_{mx} \beta_g g) \\ &= \hat{\beta}_{x_o} \beta_{mx} \beta_g var(g) \end{aligned}$$

Simplifying further

$$\begin{aligned}
\hat{\beta}_{x_o} &= \frac{\text{cov}(y_o, x_o)}{\text{var}(x_o)} \\
&= \frac{\text{cov}(\beta_{my}y, \beta_{mx}x)}{\beta_{mx}^2 \text{var}(x) + \text{var}(\epsilon_{mx})} \\
&= \frac{\beta_{mx}\beta_{my}\text{cov}(y, x)}{\beta_{mx}^2 \text{var}(x) + \text{var}(\epsilon_{mx})} \\
&= \frac{\beta_{mx}\beta_{my}\beta_x \text{var}(x)}{\beta_{mx}^2 \text{var}(x) + \text{var}(\epsilon_{mx})}
\end{aligned}$$

which can be substituted back to give

$$\begin{aligned}
\text{cov}(g, \hat{y}_o) &= \frac{\beta_{my}\beta_x\beta_g \text{var}(g)\beta_{mx}^2 \text{var}(x)}{\beta_{mx}^2 \text{var}(x) + \text{var}(\epsilon_{mx})} \\
&= \frac{\beta_{mx}^2 \text{var}(x)}{\beta_{mx}^2 \text{var}(x) + \text{var}(\epsilon_{mx})} \times \beta_{my}\beta_x\beta_g \text{var}(g)
\end{aligned}$$

Finally

$$\text{cov}(g, y_o - \hat{y}_o) = \beta_{my}\beta_x\beta_g \text{var}(g) - \frac{\beta_{mx}^2 \text{var}(x)}{\beta_{mx}^2 \text{var}(x) + \text{var}(\epsilon_m)} \times \beta_{my}\beta_x\beta_g \text{var}(g)$$

thus  $\text{cov}(g, y_o - \hat{y}_o) = 0$  if the measurement imprecision in  $x_o$  is  $\text{var}(\epsilon_m) = 0$ . However if there is any imprecision then the condition  $\text{cov}(g, y_o - \hat{y}_o) = 0$  will not hold.
